# Supplementary material for: Human Liver Stem Cell-Derived Microvesicles Inhibit Hepatoma Growth in SCID Mice by Delivering Antitumor MicroRNAs
Source: PubMed Central journal article supplement (PMC3468738; doi:10.1002/stem.1161), 2012-06-26
Supplement: stem0030-1985-SD2.pdf [file stem0030-1985-SD2.pdf]

**A****HepG2****MV-HLSC**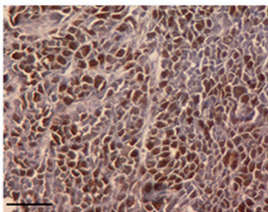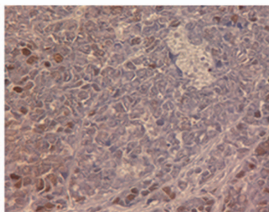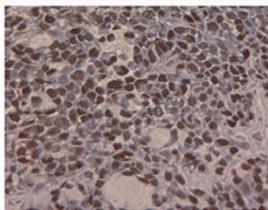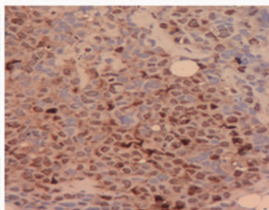**MV-RNase****MV-CD29****B****HepG2****MV-HLSC**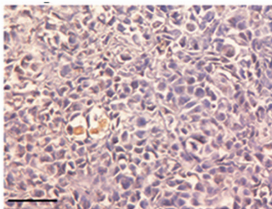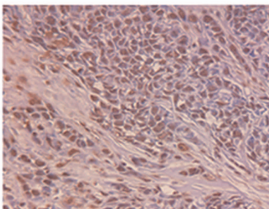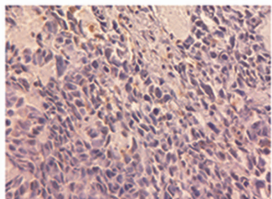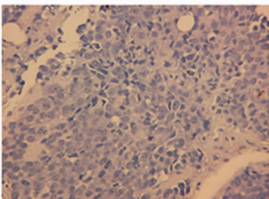**MV-RNase****MV-CD29****Supplemental Fig. 2**
