# Supplementary material for: Human Liver Stem Cell-Derived Microvesicles Inhibit Hepatoma Growth in SCID Mice by Delivering Antitumor MicroRNAs
Source: PubMed Central journal article supplement (PMC3468738; doi:10.1002/stem.1161), 2012-06-26
Supplement: stem0030-1985-SD4.pdf [file stem0030-1985-SD4.pdf]

**Supplemental Table 1.**

Primers used in qRT-PCR experiments.

| <b>Name</b>                                         | <b>Official symbol</b>         | <b>Sequences</b>                                                                                  |
|-----------------------------------------------------|--------------------------------|---------------------------------------------------------------------------------------------------|
| <b>Dicer 1, ribonuclease type III</b>               | <b>DICER1</b><br><b>(DCR1)</b> | Forward 5'-ACC CAT ACC TCA GAT TCC ACA CTT-3'<br>Reverse 5'-CTC AAG CAT TTG TAG AGA CAA CAT GA-3' |
| <b>Eukaryotic translation initiation factor 2C</b>  | <b>EIF2C2</b><br><b>(AGO2)</b> | Forward 5'- TAT TGA TGT GTC AGC AAC AGC GT -3'<br>Reverse 5'- TTA CCC TTT GGG AAT CTG TCA GAG -3' |
| <b>ATP-binding cassette, sub-family B, member 1</b> | <b>ABCB1</b><br><b>(MDR1)</b>  | Forward 5'- CTC AGA CAG GAT GTG AGT TGG TTT -3'<br>Reverse 5'-CCT GGA ACC TAT AGC CCC TTT AA-3'   |
| <b>Macrophage migration inhibitory factor</b>       | <b>MIF</b>                     | Forward 5'-GCC CGG ACA GGG TCT ACA-3'<br>Reverse 5'-GCG AAG GTG GAG TTG TTC CA-3'                 |
| <b>RAB14, member RAS oncogene family</b>            | <b>RAB14</b>                   | Forward 5'-AGT GCA AAA ACG GGA GAG AAT GT-3'<br>Reverse 5'-ACT CAG CAG CAT TCA GAT CCA AG-3'      |
| <b>E2F transcription factor 2</b>                   | <b>E2F-2</b>                   | Forward 5'-CCG TGC TGT TGG CAA CTT TAA-3'<br>Reverse 5'-TGC AGG TTG TCC TCA GTC CTG-3'            |
| <b>Integrin, beta 1</b>                             | <b>ITGB1</b><br><b>(CD29)</b>  | Forward 5'-TCAGAATTGGATTTGGCTCATTT-3'<br>Reverse 5'-TGGTGCAGTTCTGTTCACCTTGTG-3'                   |
| <b>RNA, 18S ribosomal 1</b>                         | <b>RN18S1</b>                  | Forward 5'-CCT GCC AGT AGC ATA TGC TTG TC-3'<br>Reverse 5'-AGC CAT TCG CAG TTT CAC TGT A-3'       |
| <b>Glyceraldehyde-3-phosphate dehydrogenase</b>     | <b>GAPDH</b>                   | Forward 5'- TGG AAG GAC TCA TGA CCA CAG T -3'<br>Reverse 5'- CAT CAC GCC ACA GTT TCC C-3'         |
